# Supplementary material
Source: Frontiers journal article supplement (https://www.frontiersin.org/articles/470684)
Supplement: Data_Sheet_1.PDF [file Data_Sheet_1.PDF]

## SUPPLEMENTARY METHODS

### PCR set-up

All PCRs were set up in a separate area or in a PCR-preparation room. The equipment used for reaction set-up, including pipettes, pipette tips, microfuge tubes, and strip tubes, were pre-irradiated with UV light for about 15-20 min to minimise the risk of carry-over contamination. The reaction mixtures were kept at 4°C prior to thermal cycling to minimise the unspecific amplification that may arise from residual *Taq* DNA polymerase activity at low temperatures.

### *CYP2D6* genotyping and Sanger sequencing

Two duplex long-range PCRs were used to screen for *CYP2D6* whole-gene deletion or duplication alleles that arise from recombination events at the *CYP2D* gene locus. The cross-over occurs within the repetitive elements adjacent to the *CYP2D* genes, thereby creating unique downstream sequences that can be distinguished by specific primers.

A 10 µL PCR for the detection of *CYP2D6* duplication allele(s) was set up as follows: 1× KAPA™ LongRange Reaction Buffer, 1.75 mM Mg<sup>2+</sup>, 0.3 mM of each dNTP, 0.4 µM each of 6.6kb-F and 6.6kb-R, 0.3 µM each of 2D6 Dup Frag B F and 2D6 Dup Frag B R, 1 M betaine, 0.25 U of KAPA™ LongRange DNA Polymerase (Kapa Biosystems, Inc., Wilmington, MA, USA), and 50 ng of DNA. The reaction mixture was subjected to initial heating at 94°C for 3 min, followed by 35 cycles of 94°C for 25 s, 68°C for 10 s, and 68°C for 7 min, and a final elongation step of 72°C for 7 min. Another PCR for the detection of *CYP2D6* deletion allele(s) was similarly set up, except that the primers 2D6 Dup Frag B F and 2D6 Dup Frag B R were replaced by CYP-13 and CYP-24.

The primers 6.6kb-F and 6.6kb-R amplified the entire *CYP2D6* gene plus a portion of the intergenic region, generating a 6.6-kb PCR product (Fragment A; Supplementary Figure 1). The presence of the duplication or deletion allele(s) would cause additional amplification of a 3.5-kb product (Fragment B or C). Subsequently, the long PCR product was diluted 1000-fold, and 1 µL of the diluted products was used as the templates in nine nested PCRs to prepare short amplicons for Sanger sequencing (Supplementary Table 1). The PCR mixtures comprised 1× reaction buffer, 1 µL of the diluted long amplicon, 0.2 mM of each dNTP, 0.2 µM each of the forward and reverse primers, 1.5 mM Mg<sup>2+</sup>, and 0.025 U/µL of TAQ-TI Heat-Activated DNA Polymerase (Fisher Biotec, Wembley, WA, Australia). A stringent touchdown PCR protocol was used with a starting temperature of 70°C, which was successively decreased by 1°C per cycle to reach a target temperature of 55°C.

Supplementary Table 1. Primers used for *CYP2D6* genotyping and Sanger sequencing.

| Primer name                              | Sequence (5'-3')                   | Product length | Reference           |
|------------------------------------------|------------------------------------|----------------|---------------------|
| Long PCR (the entire CYP2D6 gene)        |                                    |                |                     |
| 6.6kb-F                                  | ATG GCA GCT GCC ATA CAA TCC ACC TG | 6.6 kb         | Gaedigk et al. 2007 |
| 6.6kb-R                                  | CGA CTG AGC CCT GGG AGG TAG GTA G  |                | Gaedigk et al. 2007 |
| Duplex long PCR (whole-gene deletion)    |                                    |                |                     |
| CYP-13                                   | ACC GGG CAC CTG TAC TCC TCA        | 3.5 kb         | Steen et al. 1995   |
| CYP-24                                   | GCA TGA GCT AAG GCA CCC AGA C      |                | Steen et al. 1995   |
| Duplex long PCR (whole-gene duplication) |                                    |                |                     |
| 2D6 Dup FragB F                          | CCA TGG AAG CCC AGG ACT GAG C      | 3.5 kb         | Gaedigk et al. 2007 |
| 2D6 Dup FragB R                          | CGG CAG TGG TCA GCT AAT GAC        |                | Gaedigk et al. 2007 |

Cont'd: Supplementary Table 1

| Primer name              | Sequence (5'-3')                       | Product length | Reference                  |
|--------------------------|----------------------------------------|----------------|----------------------------|
| <i>CYP2D6 sequencing</i> |                                        |                |                            |
| 6.6kb-F                  | ATG GCA GCT GCC ATA CAA TCC ACC TG     | 1071 bp        | Gaedigk <i>et al.</i> 2007 |
| 2D6-1496/2SR             | CCA GTC ACA CAC ACA TAC AGA CCC GGC    |                | NA                         |
| 2D6PromF                 | TCC TCC ATA ACG TTC CCA CCA GAT        | 1071 bp        | Wright <i>et al.</i> 2010  |
| 2D6PromR                 | CCA TAC CTG CCT CAC TAC CAA ATG        |                | Wright <i>et al.</i> 2010  |
| 2D6Ex1F                  | TCT GGA GCA GCC CAT ACC CG             | 1062 bp        | Wright <i>et al.</i> 2010  |
| 2D6Ex1SR                 | CCC CAG ACT ACA GGT CCT AGT CCT ATT TG |                | NA                         |
| 2D6Ex2F                  | TCC TCC TTC CAC CTG CTC AC             | 675 bp         | Wright <i>et al.</i> 2010  |
| 2D6Ex2SR                 | CTT TGC CCC ACC TCG TCT CT             |                | NA                         |
| 2D6Ex34F                 | AGC TGG AAT CCG GTG TCG AA             | 1070 bp        | Wright <i>et al.</i> 2010  |
| 2D6Ex34SR                | AGC CAT CTC CAG GTA GAC CCA G          |                | NA                         |
| 2D6Ex56F                 | ACA GGC AGG CCC TGG GTC TA             | 884 bp         | Wright <i>et al.</i> 2010  |
| 2D6Ex56SR                | CCT GGT CAC CCA TCT CTG GTC            |                | NA                         |
| 2D6Ex7F                  | CCA ACA TAG GAG GCA AGA AG             | 691 bp         | Wright <i>et al.</i> 2010  |
| 2D6Ex7R                  | ACT GGA CTC TAG GAT GCT GG             |                | Wright <i>et al.</i> 2010  |
| 2D6Ex8F                  | CAG AAT GTT GGA GGA CCC AA             | 612 bp         | Wright <i>et al.</i> 2010  |
| 2D6Ex8R                  | AGG AAA GCA AAG ACA CCA TG             |                | Wright <i>et al.</i> 2010  |
| 2D6Ex9F                  | TGA AGG ATG AGG CCG TCT GG             | 920 bp         | Wright <i>et al.</i> 2010  |
| 2D6-R                    | ACT GAG CCC TGG GAG GTA GGT AG         |                | Gaedigk and Coetsee 2008   |

***SULT2A1* PCRs and sequencing**

Seven amplicons covering the promoter region and all six exons of the *SULT2A1* gene were generated using the primers listed in Supplementary Table 2. The PCR mixtures comprised 1× reaction buffer, 2.5 ng/μL of template DNA, 0.2 mM of each dNTP, 0.2 μM each of the forward and reverse primers, 1.5 mM Mg<sup>2+</sup>, and 0.025 U/μL of HOT FIREPol® DNA Polymerase (Solis BioDyne, Tartu, Estonia). The final concentrations of all primers were 0.3 μM. A touchdown protocol was used to run all reactions simultaneously. The PCR was initiated with an annealing temperature of 65°C, which was decreased by 1°C per cycle to reach a target temperature of 50°C.

Supplementary Table 2. Primers used for *SULT2A1* sequencing.

| Primer name  | Sequence (5'-3')                  | Product length | Reference                 |
|--------------|-----------------------------------|----------------|---------------------------|
| SULT2A1UpsF  | AAG ATG AGA ACA GAT AAA GAC TGT G | 537 bp         | NA                        |
| SULT2A1UpsR  | CGA CAT GAT GAT GAC CTC TT        |                | NA                        |
| SULT2A1Exn1F | TAA ACT TTA CAA CAA ACA TGT GAC   | 431 bp         | NA                        |
| SULT2A1Exn1R | TTC TCT GAT TGT CAA TGG TAT TAG G |                | NA                        |
| SULT2A1Ex2F  | ATG TCC GGC TGA GAT GGT ACA       | 372 bp         | Thomae <i>et al.</i> 2002 |
| SULT2A1Ex2R  | AAC ACA GAC CTG TTG AAG GAG       |                | Thomae <i>et al.</i> 2002 |
| SULT2A1Exn3F | AAA TTT GAT TAG TGA GTG CAG TAA G | 455 bp         | NA                        |
| SULT2A1Exn3R | GCT AGA GTT CTG CTG CTA TG        |                | NA                        |
| SULT2A1Exn4F | CTG ACT AAT ACA CTG TCA TTC CAT A | 456 bp         | NA                        |
| SULT2A1Exn4R | TTA ATC CTG CTC TTT GTG ACT CTT C |                | NA                        |
| SULT2A1Ex5F  | GGG ATT ACA GGC GTG AAC CAC C     | 351 bp         | Thomae <i>et al.</i> 2002 |
| SULT2A1Ex5R  | GCA CTC TTT CAT CTC AAC TGT T     |                | Thomae <i>et al.</i> 2002 |
| SULT2A1Exn6F | GAT AAA GGC CCA CCA CGA AC        | 367 bp         | NA                        |
| SULT2A1Exn6R | GCA GAG GTT TGA TAT TTA AGG TTT   |                | NA                        |

## SUPPLEMENTARY FIGURES

### A. *CYP2D6* duplication and deletion alleles

Typical deletion arrangement

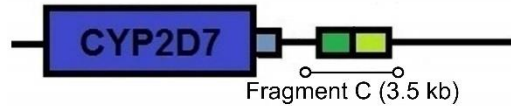

Typical duplication arrangement

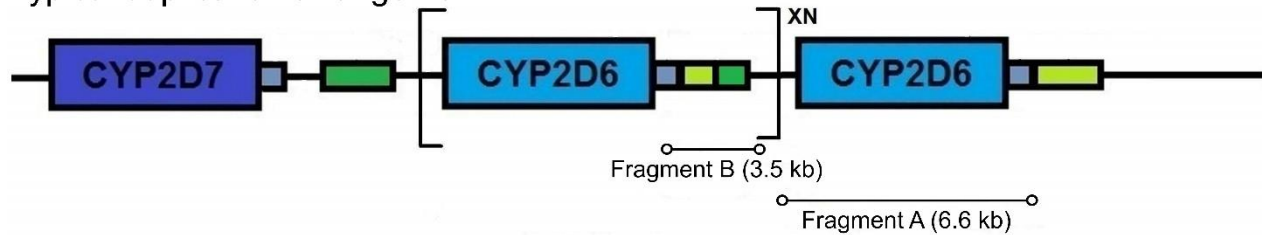

### B. Duplex long PCRs to detect *CYP2D6* duplication or deletion

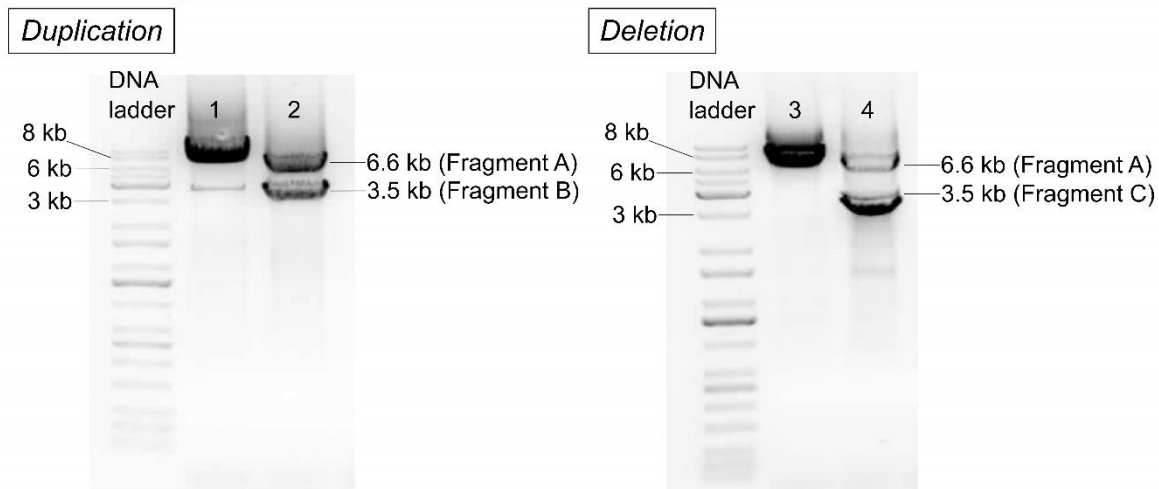

Supplementary Figure 1. **A.** Typical *CYP2D6* gene structures following recombination events that result in whole-gene deletion or duplication. The attendant, chimeric sequences downstream of *CYP2D6* and *CYP2D7* (represented by the two-coloured blocks) are formed by exchange of gene segments between the two genes and can be detected by specific primers, yielding a 3.5 kb product (Gaedigk *et al.* 2007). **B.** Duplex long PCRs performed to detect the *CYP2D6* duplication or deletion allele(s) using the DNA sample from the Case 2 participant (lanes 1 and 3). A sample with known *CYP2D6* duplication and deletion alleles was used as a positive control (lanes 2 and 4). Negligible or no amplification of the 3.5 kb product indicated the absence of the duplication or deletion allele(s). Though not shown in the gel image, a no-template control was also included in each PCR to check for cross-contamination.

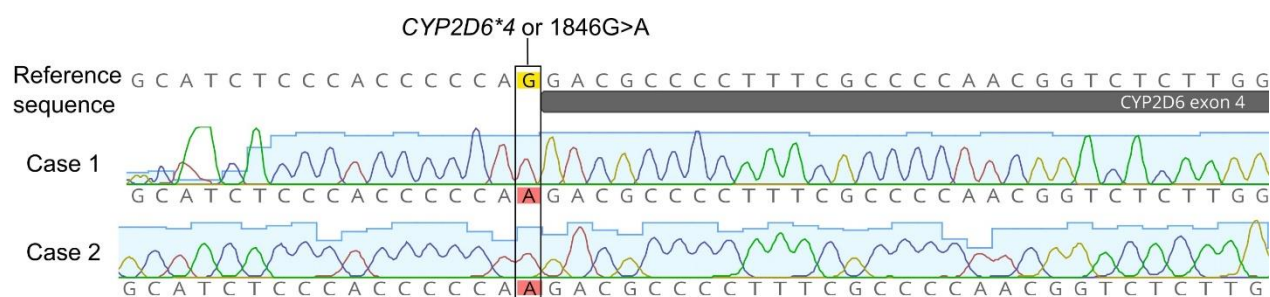

Supplementary Figure 2. Sanger sequences, aligned against M33388.1 (*CYP2D6*), showing the presence of the loss-of-function *CYP2D6*\*4 in both participants.

## REFERENCES

- Gaedigk A, Ndjountché L, Divakaran K *et al.* Cytochrome P4502D6 (*CYP2D6*) gene locus heterogeneity: characterization of gene duplication events. *Clin. Pharmacol. Ther.* 81(2), 242-251 (2007).
- Gaedigk A, Coetsee C. The *CYP2D6* gene locus in South African Coloureds: unique allele distributions, novel alleles and gene arrangements. *Eur. J. Clin. Pharmacol.* 64(5), 465-475 (2008).
- Gaedigk A, Jaime LK, Bertino JS Jr *et al.* Identification of novel *CYP2D7-2D6* hybrids: non-functional and functional variants. *Front. Pharmacol.* 1, 121 (2010).
- Steen VM, Molven A, Aarskog NK, Gulbrandsen AK. Homologous unequal cross-over involving a 2.8 kb direct repeat as a mechanism for the generation of allelic variants of human cytochrome P450 *CYP2D6* gene. *Hum. Mol. Genet.* 4(12), 2251-2257 (1995).
- Thomae BA, Eckloff BW, Freimuth RR, Wieben ED, Weinshilboum RM. Human sulfotransferase *SULT2A1* pharmacogenetics: genotype-to-phenotype studies. *Pharmacogenomics J.* 2(1), 48-56 (2002).
- Wright GEB, Niehaus DJH, Drögemöller BI, Koen L, Gaedigk A, Warnich L. Elucidation of *CYP2D6* genetic diversity in a unique African population: implications for the future application of pharmacogenetics in the Xhosa population. *Ann. Hum. Genet.* 74(4), 340-350 (2010).
